# Supplementary material for: Improving lives by accelerating progress towards the UN Sustainable Development Goals for adolescents living with HIV: a prospective cohort study
Source: PubMed Central journal article supplement — Lancet Child Adolesc Health. 2019 Apr;3(4):245–54. doi: 10.1016/S2352-4642(19)30033-1 (PMC6559259; doi:10.1016/s2352-4642(19)30033-1), 2019-04
Supplement: mmc1.pdf [file mmc1.pdf]

# THE LANCET

## Child & Adolescent Health

### Supplementary appendix

This appendix formed part of the original submission and has been peer reviewed. We post it as supplied by the authors.

Supplement to: Cluver LD, Orkin FM, Campeau L, et al. Improving lives by accelerating progress towards the UN Sustainable Development Goals for adolescents living with HIV: a prospective cohort study. *Lancet Child Adolesc Health* 2019; **3**: 245–54.

**Table S1. Governments and agencies identifying possible development accelerators**

| <b>Hypothesised accelerator</b> | <b>Identified through consultation</b>              |
|---------------------------------|-----------------------------------------------------|
| Free schooling                  | USAID-PEPFAR                                        |
|                                 | Government of Kenya                                 |
|                                 | Government of Tanzania                              |
|                                 | Government of Sierra Leone                          |
|                                 | UNFPA                                               |
| Cash transfers                  | UNDP                                                |
|                                 | UNICEF                                              |
|                                 | UN Inter-Agency Task Team for Social Protection     |
|                                 | Government of South Africa                          |
|                                 | Government of Kenya                                 |
|                                 | Government of Lesotho                               |
| Safe schools                    | UKAID/DFID                                          |
|                                 | African Union Development Agency                    |
|                                 | Government of Uganda                                |
|                                 | Government of Tanzania                              |
|                                 | Government of South Africa                          |
| HIV support group               | UNAIDS                                              |
|                                 | Global Fund to End TB, AIDS and Malaria             |
|                                 | Pediatric Adolescent Treatment for Africa           |
|                                 | International AIDS Alliance                         |
|                                 | UN Women                                            |
|                                 | Government of Zambia                                |
|                                 | Government of South Africa                          |
| Free school meals               | World Food Program                                  |
|                                 | Government of South Sudan                           |
|                                 | Government of Lesotho                               |
| Parenting support               | Global Partnership to End Violence against Children |
|                                 | USAID-PEPFAR                                        |
|                                 | Catholic Relief Services                            |
|                                 | Government of South Africa                          |
|                                 | International Rescue Committee                      |

**Table S2. Association between self-reported past week adherence to ART and undetectable viral load using multivariable logistic regression (n=521)**

| Variables                      | aOR <sup>1</sup> (95% CI <sup>2</sup> , p-value) |
|--------------------------------|--------------------------------------------------|
| Consistent past week adherence | 1.65 (1.11-2.44; 0.013)                          |
| <b>Covariates</b>              |                                                  |
| Age ( $\geq 15$ )              | 0.97 (0.90-1.05; 0.43)                           |
| Gender                         | 0.9 (0.62-1.31; 0.59)                            |
| Rural location                 | 0.7 (0.46-1.05; 0.088)                           |
| Informal housing               | 1.03 (0.62-1.70; 0.91)                           |
| Poverty                        | 1.33 (0.83-2.11; 0.24)                           |
| Maternal orphanhood            | 0.85 (0.58-1.25; 0.40)                           |
| Paternal orphanhood            | 0.99 (0.67-1.48; 0.97)                           |
| Horizontally infected          | 0.8 (0.46-1.42; 0.45)                            |
| Poor health                    | 0.68 (0.27-1.72; 0.42)                           |

<sup>1</sup> Adjusted odds ratios, <sup>2</sup> Confidence intervals
